# Supplementary material for: Adaptation mechanism of mango fruit (Mangifera indicaL. cv. Chaunsa White) to heat suggest modulation in several metabolic pathways
Source: Royal Society of Chemistry journal article supplement (doi:10.1039/d0ra01223h), 2020-01-01
Supplement: d0ra01223h1.xlsx [file d0ra01223h1.xlsx]

## Sheet: Identified-Filtered for found i
Compound	Retention Time
Formamide, N,N-dimethyl- (CAS) N,N-Dimethylformamide DMFA DMF (amide)	6.6886
2-Penten-2,4-diol, 4-methyl-, bis(trimethylsilyl)ether	14.9754
SILANE, [[2-[3,4-BIS[(TRIMETHYLSILYL)OXY]PHENYL]-3,4-DIHYDRO-2H-1-BENZOPYRAN...	60.3021
XYLITOL 5TMS Xylitol, 1,2,3,4,5-pentakis-O-(trimethylsilyl)- (CAS)	28.5912
2(3H)-Furanone, dihydro-3,4-bis[(trimethylsilyl)oxy]-, trans-	18.0262
.beta.-D-Galactofuranose, 1,2,3,5,6-pentakis-O-(trimethylsilyl)-	39.3943
Docosanoic acid, trimethylsilyl ester Trimethylsilyl docosanoate #	56.854
Malic acid, O-(trimethylsilyl)-, bis(trimethylsilyl)ester	20.0382
Butane-1,3-diol, 1-methylene-3-methyl-, bis(trimethylsilyl)ether	15.4712
Gulose, 2,3,4,5,6-pentakis-O-(trimethylsilyl)-	49.3175
Glucopyranose, 1,2,3,4,6-pentakis-O-(trimethylsilyl)-, D- (CAS)	43.3468
Tetradecane (CAS) n-Tetradecane Isotetradecane n - tetra - decane	17.0753
Ethanol, 2-(1-methylethoxy)- (CAS) 2-Isopropoxyethanol Ucar AC	10.6445
Pyridine, 3-trimethylsiloxy- 3-[(Trimethylsilyl)oxy]pyridine #	13.582
L-Threonic acid, tris(trimethylsilyl) ether, trimethylsilyl ester	21.9218
Silane, (hexacosyloxy)trimethyl-	60.6495
D-LACTIC ACID-DITMS LACTIC ACID-DITMS Bis(trimethylsilyl)lactate	11.9977
Decane, 2,4-dimethyl- 2,4-Dimethyldecane	16.4257
Octadecanoic acid, 2,3-bis[(trimethylsilyl)oxy]propyl ester	58.8251
Arabinofuranose, 1,2,3,5-tetrakis-O-(trimethylsilyl)-	32.4988
Hexatriacontane (CAS) n-Hexatriacontane NOR-HEXATRIACONTANE	54.846
Trimethylsilyl ether of glycerol Glycerol, tris(trimethylsilyl) ether	17.0688
Butanedioic acid, bis(trimethylsilyl) ester Succinic acid (tms)	16.7924
Decane, 2,9-dimethyl- 2,9-Dimethyldecane	17.2038
Propane, 2-methyl-1,2-bis(trimethylsiloxy)-	11.177
Inositol, 1,2,3,4,5,6-hexakis-O-(trimethylsilyl)-, muco-	47.104
Hexadecanoic acid, trimethylsilyl ester Palmitic acid, trimethylsilyl ester	45.7144
ALLOSE PER-TMS HEXOPYRANOSE, 1,2,3,4,6-PENTAKIS-O-(TRIMETHYLSILYL)-	41.96
1,2,3-BUTANTRIOL, TRIS-O-(TRIMETHYLSILYL)-	16.5503
Tetracosane (CAS) n-Tetracosane n - tetracosane	17.446
L-(+)-Tartaric acid, bis(trimethylsilyl) ether, bis(trimethylsilyl) ester	23.2505
.alpha.-D-Galactoside, methyl tetrakis-O-(trimethylsilyl)- (CAS)	51.4097
Silane, tetramethyl- (CAS) Tetramethylsilane (CH3)4Si Si(CH3)4	32.4177
Octadecanoic acid, trimethylsilyl ester Stearic acid, trimethylsilyl ester	50.5229
Guaicol-.beta.-d-glucopyranoside, pentakis(O-trimethylsilyl)-	54.3395
4-TRIMETHYLSILYLOXYPHENETHYL-N,N-BIS(TRIMETHYLSILYL)AMINE	22.16
2-METHYL-4-KETO-PENTAN-2-OL 1TMS	14.6364
Methyl 5-[3,3-bis(trimethylsilyl)oxiran-2-yl]pentanoate	38.7572
(1'S,2S/R)-N-[o-(1'-(.alpha.-Furyl)-1'-hydroxymethyl)benzenesulfonyl]-2-hydr...	40.563
Butanoic acid, 4-[bis(trimethylsilyl)amino]-, trimethylsilyl ester (CAS)	21.072
1,8-Dihydroxyanthraquinone ditms	62.8505
Trisiloxane, octamethyl- Octamethyltrisiloxane [(CH3)3SiO]2Si(CH3)2	8.00269
ERYTHRITOL PER-TMS Butane, 1,2,3,4-tetrakis[(trimethylsilyl)oxy]-	28.0927
Olivetol, bis(trimethylsilyl) ether	60.0623
3,6-Dioxa-2,7-disilaoctane, 2,2,4,7,7-pentamethyl-	10.7066
1,1,1-Trifluoro-4-(trimethylsilyloxy)-3-penten-2-one	8.71375
Tetracosan-1-ol trimethylsilyl ether	58.2415
Propanoic acid, 2,3-bis[(trimethylsilyl)oxy]-, trimethylsilyl ester	17.1785
Xylonic acid, 2,3,5-tris-O-(trimethylsilyl)-, .gamma.-lactone, D- (CAS)	25.0378
Trifluoromethyltrimethylsilane Trifluoromethyl(trimethyl)silane	6.6015
MANNITOL TMS	43.003
1-[Bis(trimethylsilyl)amino]-1-fluoro-3,3,3-trimethyl-1-[(trimethylsilyl)ami...	59.9953
Silane, trimethyl[[5-methyl-2-(1-methylethenyl)-4-hexenyl]oxy]-	17.7027
2',6'-Bis[2-(trimethylsilyl)ethyl]acetophenone	42.268
Silanamine, N,N'-methanetetraylbis[1,1,1-trimethyl-	9.84475
2(3H)-Furanone, dihydro-3,4-bis[(trimethylsilyl)oxy]-, cis-	19.03
Eicosanoic acid, trimethylsilyl ester Arachidic acid, trimethylsilyl ester	53.9915
2-Oxovaleric acid, tert-butyldimethylsilyl ester	13.4549
C7 TMS	13.2106
D-Xylose, tetrakis(trimethylsilyl)- Per(trimethylsilyl)-D-xylose	40.114
Ethanamine, N,N-dimethyl-2-[(trimethylsilyl)oxy]-	8.57775
Tetracosanoic acid, trimethylsilyl ester Trimethylsilyl tetracosanoate #	59.3765
1,8-Dihydroxyanthraquinone, O,O'-bis(trimethylsilyl)-	63.9433
XYLENE	8.23633
MELEZITOSE TMS	58.3543
TREHALOSE TMS	61.2899
Hexadecanoic acid, 2,3-bis[(trimethylsilyl)oxy]propyl ester	56.2882
Undecane, 5-methyl- (CAS) 5-Methylundecane Methylundecane	13.82
Benzoic acid, 3,4,5-tris(trimethylsiloxy)-, trimethylsilyl ester (CAS)	43.2807
Silane, trimethyl[[(3.beta.)-stigmast-5-en-3-yl]oxy]- (CAS)	68.7418
INOSITOL,O,O,O,O,O,O-TMS	47.9589
Silane, (1,1-dimethylpropoxy)trimethyl- (CAS)	13.1186
Arabinose, 2,3,4,5-tetrakis-O-(trimethylsilyl)-	24.8762
RAFFINOSE TMS	67.89
Linalool, trimethylsilyl ether	15.4404
l-Valine, trimethylsilyl ester Trimethylsilyl 2-amino-3-methylbutanoate #	12.5325
Benzo[g]pyrido[2,1-a]isoindolium Perchlorate	34.4353
N-(Trimethylsilyl)acetamide Trimethylsilylacetamide	8.811
Silanol, trimethyl-, phosphate (3:1) (CAS) PHOSPHORIC ACID-TRITMS	16.2302
9,12-Octadecadienoic acid (Z,Z)-, trimethylsilyl ester	49.8939
D-GLUCURONIC ACID PK B 5TMS 2-KET0-D-GLUCONIC ACID 5TMS	53.5619
Lyxose, tetra-(trimethylsilyl)-ether	53.4329
OCTADECAN-1-OL TRIMETHYLSILYL ETHER 1-Trimethylsilyloxyoctadecane	48.6524
D-Gluconic acid, 2,3,4,5,6-pentakis-O-(trimethylsilyl)-, trimethylsilyl ester	45.384
Ribitol, 1,2,3,4,5-pentakis-O-(trimethylsilyl)-	30.47
(2E,4E)-N-Isopropyl-6-hydroxy-6-phenyl-2,4-hexadienamide	69.9455
Silanamine, N,1,1,1-tetramethyl-N-(trimethylsilyl)- Heptamethyldisilazane	8.13814
Nonane, 2,6-dimethyl- 2,6-Dimethylnonane	11.161
Benzene, 1,2-dimethyl- (CAS) o-Xylene o-Xylol 3,4-Xylene 1,2-Xylene	8.227
Hexacosanoic acid, trimethylsilyl ester	61.8947
(E)-3-(tert-Butyldimethylsilyl)prop-2-en-1-ol	7.676
2-O-Glycerol-.alpha.-d-galactopyranoside, hexa-TMS	54.3101
3,6-Dioxa-2,7-disilaoctane, 2,2,7,7-tetramethyl- (CAS) ETHYLENE GLYCOL DITMS	8.36012
Undecane, 4,7-dimethyl- (CAS) 4,7-Dimethylundecane 4,7-DIMETHYLUNDECANE #	15.906
D-Xylopyranose, 1,2,3,4-tetrakis-O-(trimethylsilyl)- (CAS) XYLOSE-TETRATMS	45.1011
3,7-Dioxa-2,8-disilanonane, 2,2,8,8-tetramethyl-5-[(trimethylsilyl)oxy]- (CAS)	16.1394
Melibiose, octakis(trimethylsilyl)-	55.9783
Undecane, 3,7-dimethyl- (CAS) 3,7-Dimethylundecane 3,7-DIMETHYLUNDECANE #	11.9235
Mannose, 6-deoxy-2,3,4,5-tetrakis-O-(trimethylsilyl)-, L-	44.2386
Ethylbenzene Benzene, ethyl- Ethylbenzol Phenylethane Aethylbenzol	7.9394
Glucopyranose, 1,2,3,4,6-pentakis-O-(trimethylsilyl)-, D-	51.352
Acetic acid, [(trimethylsilyl)oxy]-, trimethylsilyl ester	12.2764
Pentadecane (CAS) n-Pentadecane CH3(CH2)13CH3 .n - penta - decane	18.6578
Octane, 2,7-dimethyl- Diisoamyl Diisopentyl 2,7-Dimethyloctane	15.6512
Nonane, 4,5-dimethyl- (CAS) 4,5-DIMETHYL-NONANE 4,5-Dimethylnonane	12.098
D-Xylopyranose, 1,2,3,4-tetrakis-O-(trimethylsilyl)-	49.2168
Erythritol, 1,2,3,4-tetrakis-O-(trimethylsilyl)-	31.8478
Salbutamol, N-trifluoroacetyl-o,o,o-tris(trimethylsilyl)deriv.	63.0542
Propanoic acid, 2-[(trimethylsilyl)oxy]-, trimethylsilyl ester	12.0047
Silane, trimethyl[[(3.beta.,22E)-stigmasta-5,22-dien-3-yl]oxy]- (CAS)	67.3682
L-MENTHONE CYCLOHEXANONE, 5-METHYL-2-(1-METHYLETHYL)- DL-MENTHONE	14.0714
2-Benzyl-3-(trimethylsilyl)prop-1-ene	50.9887
1,3-Cyclopentadiene, 5-(1-methylethylidene)- Dimethylfulvene	7.97433
acetyl(t-butyl)[(trimethylsilyl)methyl]silane	11.5513
Trimethyl[4-(2-methyl-4-oxo-2-pentyl)phenoxy]silane	23.4427
3-Methyl-4-iodo-5-butylfuran-2(5H)-one	62.9285
2-Isopropyl-2-methyl-3-phenyl-aziridine	16.0725
3-Ethoxycarbonylmethyl-7-methoxycarbonylphthalide	42.9035
3,3-Dibenzyl-5-(phenylthio)-2(3H)-furanone	69.929
Dodecane, 4,6-dimethyl- 4,6-Dimethyldodecane #	18.6795
L-Altrose, 2,3,4,5,6-pentakis-O-(trimethylsilyl)- (CAS)	36.9655
FUCOSE PER-TMS	34.5544
Heptane, 4-ethyl- (CAS) 4-Ethylheptane	11.013
MALTOSE MEOX2 TMS	59.205
Tridecane (CAS) n-Tridecane Tridecane, n- n - tri - decanene	13.2895
Gulonic acid, 2,3,5,6-tetrakis-O-(trimethylsilyl)-, lactone	56.1973
Tetradecane, 2,6,10-trimethyl- (CAS) 2,6,10-Trimethyltetradecane	16.7823
Acetamide, 2,2,2-trifluoro-N-methyl-N-(trimethylsilyl)- MSTFA	7.834
Decane, 4-methyl- (CAS) 4-Methyldecane	11.1603
2-Butenedioic acid (E)-, bis(trimethylsilyl) ester (CAS) FUMARIC ACID 2TMS	17.3325
1H-Indole-3-acetic acid, 1-(trimethylsilyl)-, ethyl ester (CAS)	45.3925
D-Galactose, 2,3,4,5,6-pentakis-O-(trimethylsilyl)- (CAS) GALACTOSE-PENTATMS	41.859
13-GLUCOPYRANOSYLOXYDOCOSANOIC ACID TETRA-TMS	64.463
ETHYLENGLYCOLE, TBS 2X	18.1553
Ribonic acid, 2,3,4,5-tetrakis-O-(trimethylsilyl)-, trimethylsilyl ester	30.279
Decane, 2-methyl- (CAS) 2-Methyldecane 2-Methyl-decane n-C8H17CH(CH3)2	17.1065
Undecane, 4,4-dimethyl- 4,4-Dimethylundecane #	15.5475
Benzene, ethyl- (CAS) Ethylbenzene Phenylethane Ethylbenzol	7.84825
Silane, [(3,7-dimethyl-6-octenyl)oxy]trimethyl- (CAS)	16.8107
MONOMETHYLPHOSPHATE 2TMS	14.3805
2-Butenedioic acid (Z)-, bis(trimethylsilyl) ester Maleic acid (tms)	16.904
Stigmasterol trimethylsilyl ether	67.3758
3-methoxy-1-phenylprop-1-yne Benzene, (3-methoxy-1-propynyl)- (CAS)	11.5385
1-(1-METHYL-2,2-D2-2-TRIMETHYLSILYLOXYETHYL)-4-(2-METHYL-2-TRIMETHYLSILYLOXY...	24.7115
.alpha.-Linolenic acid, trimethylsilyl ester	50.05
Silane, [[(3.beta.,24R)-ergost-5-en-3-yl]oxy]trimethyl- (CAS)	66.7197
DIMETHYL SULFOXIDE-D(6) Deutero-,dimethylsulfoxide dimethylsulfoxide-D6	7.46433
Per(trimethylsilyl)-D-mannose	40.9325
2,3,4,5-Tetrahydroxypentanoic acid-1,4-lactone, tris(trimethylsilyl)-	28.9295
Hexane, 3,3-dimethyl- (CAS) 3,3-Dimethylhexane 3,3-DIMETHYL HEXANE	15.906
Disiloxane, hexamethyl- (CAS) Hexamethyldisiloxane Fluka AG	12.8614
l-Aspartic acid, bis(trimethylsilyl) ester	18.7462
Sulfurous acid, 2-ethylhexyl hexyl ester	21.1475
D-Ribose, 2,3,4,5-tetrakis-O-(trimethylsilyl)-	24.0978
.beta.-D-Galactopyranose, 1,2,3,4,6-pentakis-O-(trimethylsilyl)- (CAS)	43.8395
(3E)-[(Trimethylsilyl)methylidene]octahydroinden-4-one	16.8665
Linalol oxide, trimethylsilyl ether	20.1746
Disiloxane, hexamethyl- Bis(trimethylsilyl) ether Fluka AG	12.9046
.ALPHA.-D-GLUCOPYRANOSIDE, 1,3,4,6-TETRAKIS-O-(TRIMETHYLSILYL)-.BETA.-D-FRUC...	57.7055
4-Cyano -4-methyltetralone	14.5785
Methyl (3-tert-butyldimethylsiloxy-6-phenyloxycarbonyl-6-azabicyclo[3.2.2]no...	34.1757
Pentane, 2,2,3-trimethyl- (CAS) 2,2,3-Trimethylpentane	10.5681
(+)-4-Carene 4,7,7-Trimethylbicyclo[4.1.0]hept-2-ene #	12.687
Decane, 2,3,5,8-tetramethyl- 2,3,5,8-Tetramethyldecane #	16.2195
Octane, 3,3-dimethyl- 3,3-Dimethyloctane	11.1605
Dodecane (CAS) n-Dodecane Ba 51-090453 Adakane 12 Isododecane	12.212
trans-Caryophyllene l-Caryophyllene (-)-Caryophyllene Caryophyllene	19.1195
Gulose, 2,3,4,5,6-pentakis-O-(trimethylsilyl)- (CAS) GULOSE-PENTATMS	62.4205
1,3-Dioxolane (CAS) 1,3-Dioxolan Glycolformal Formal glycol	35.423
Ethyl 2-[2-Amino-4-(ethoxycarbonyl)phenyl]benzothiophene-6-carboxylate	62.8352
Trimethyl(2,6 ditert.-butylphenoxy)silane	21.449
Pentasiloxane, dodecamethyl- Dodecamethylpentasiloxane	14.2842
Silane, (hexadecyloxy)trimethyl- (CAS) MONOTRIMETHYLSILYL 1-HEXADECANOL	42.5308
2-Monopalmitin trimethylsilyl ether	55.8155
Pentitol, 1-desoxytetrakis-O-(trimethylsilyl)-	21.448
QUINIC ACID-PENTATMS QUINIC ACID TMS	38.502
SUCROSE TMS	61.1424
GALACTONIC ACID HEXA-TMS	45.388
1,2-Bis(trimethylsiloxy)ethane Ethylene glycol, bistrimethylsilyl ether	8.3548
Formamide, N,N-dimethyl- Dimethylformamide DMF (Amide) DMFA	6.73483
2-HYDROXYPYRIDINE, TBS 1X	11.502
SHIKIMIC ACID-TETRATMS TETRA-(TRIMETHYLSILYL)SHIKIMATE SHIKIMIC ACID TMS	33.4385
D-Glucitol, 6-deoxy-1,2,3,4,5-pentakis-O-(trimethylsilyl)-	32.2983
2-Propanone, 1-cyclopropyl- (CAS) Cyclopropylacetone 1-Cyclopropylacetone	6.75833
Benzoic acid, 3,4,5-tris(trimethylsiloxy)-, trimethylsilyl ester	43.244
(R)-3-Hydroxybutyric acid, trimethylsilyl ether, trimethylsilyl ester	13.9807
2,3,4,5-Tetrahydro-1H-3-benzazepine	11.994
DL-Malic acid, O-trimethylsilyl-, bis(trimethylsilyl) ester	20.06
Cyclopentasiloxane, decamethyl- Decamethylcyclopentasiloxane	13.6667
Cyclohexasiloxane, dodecamethyl- Dodecamethylcyclohexasiloxane	16.8778
3-[(trimethylsilyl)oxy]indene	48.4192
2,3,4-Trihydroxybutyric acid tetrakis(trimethylsilyl) deriv.	21.921
Myristic acid, 2-(trimethylsiloxy)-1-[(trimethylsiloxy)methyl]ethyl ester	52.907
Uridine, 2',3',5'-tris-O-(trimethylsilyl)-	54.5112
2,3.beta.,4.beta.-tri(trimethylsiloxy)-5.beta.-formyloxy-perhydropyran	42.0156
PALMITOLEIC ACID 1TMS palmitoleic acid TMS ester	45.0343
.alpha.-Tocopherol (vitamin E), trimethysilyl derivative	64.049
D-ARABINOSE 4TMS Per(trimethylsilyl)-D-arabinose	58.857
2-Deoxy ribose O,O',O''-tris(trimethylsilyl)-	51.5758
3-Pyridinecarboxylic acid, trimethylsilyl ester (CAS) Nicotinic acid-TMS	16.5363
Ethane, 1,1-diethoxy- (CAS) 1,1-Diethoxyethane Acetal Diethyl acetal	43.9836
Cyclotetrasiloxane, octamethyl- (CAS) Octamethylcyclotetrasiloxane	10.4535
.beta.-D-Glucopyranose, 1,2,3,4,6-pentakis-O-(trimethylsilyl)- (CAS)	28.56
Heptadecane, 7-methyl- (CAS) 7-Methylheptadecane 7 - methyl - heptadecane	14.8258
D-Turanose, heptakis(trimethylsilyl)-	58.0026
Geraniol, trimethylsilyl ether	17.702
2-PENTANONE, 4-HYDROXY-4-METHYL- (CH3)2C(OH)CH2C(O)CH3	7.5065
2-Thioxo-5a-methyl-(perhydro)-1,3-pyrimido[3,4-b]benzimidazole	54.6445
Talose, 2,3,4,5,6-pentakis-O-(trimethylsilyl)-	51.9455
Thioacetonitrile	40.5117
.beta.-Citronellol, trimethylsilyl ether	16.8134
Pentane, 2,2,3-trimethyl- 2,2,3-Trimethylpentane (CH3)3CCH(CH3)CH2CH3	10.5695
2-Butenedioic acid (Z)-, bis(trimethylsilyl) ester (CAS) MALEIC-DITMS	26.4765
Hexadecane (CAS) n-Hexadecane Cetane n-Cetane Isohexadecane	17.2965
2-[(Trimethylsilylmethylamino)(methylthio)]methylene-1,3-indandione	42.093
Silanol, trimethyl-, propanoate Silanol, trimethyl-, propionate	13.1207
Dodecane, 2,6,11-trimethyl- (CAS) 2,6,11-Trimethyldodecane	15.1873
2,6-di-butyl-2,5-cyclohexadiene-1,4-dione	19.8405
Heptane, 3-ethyl-5-methyl- 3-Ethyl-5-methylheptane	11.159
.alpha.-l-Galactofuranoside, methyl 6-deoxy-2,3,5-tris-O-(trimethylsilyl)-	24.464
(1'R,3S,4S)-3-(1'-((tert-Butyldimethylsilyl)oxy)ethyl)-1-(4'-methoxyphenyl)-...	34.0965
DL-Malic acid, bis(trimethylsilyl) ester	18.261
decyl propanoate Propanoic acid, decyl ester n-Decyl propanoate	51.586
spiro[1,3-dithiane-2,4'-cyclopent[c]isoxazolidine]	37.461
Benzene, 1,4-dimethyl- (CAS) p-Xylene p-Xylol 1,4-Xylene Chromar	8.12667
Undecane, 2,7-dimethyl- 2,7-Dimethylundecane #	17.843
Hexacosane (CAS) n-Hexacosane n - hexacosane cerane	17.4235
2,3-didecyl-1,4-naphthoquinone 1,4-Naphthalenedione, 2,3-didecyl- (CAS)	33.858
2,5-Cyclohexadiene-1,4-dione, 2,6-bis(1,1-dimethylethyl)- (CAS)	19.841
1,3-Dihydroxyanthraquinone ditms	64.0115
1,3-bis(trimethylsilyl) 2,3-di(trimethylsiloxy)-2-propenoate	43.8355
Acetoxyacetic acid Acetic acid, (acetyloxy)- Glycolic acid, acetate	20.0395
d-Erythrotetrofuranose, tris-O-(trimethylsilyl)-	36.556
(4,5-trans)-3-Methylene-5-(pentafluorophenylpentafluorophenylaminomethyl)hep...	57.945
Silanol, trimethyl-, phosphate (3:1) Tris(trimethylsilyl) phosphate	16.2455
Pentane1,2,3,4,5-tpentaol pentaTMS dev	28.333
Pentane, 2-methyl-4-keto-2-trimethylsiloxy-	11.601
Myo-Inositol, 1,2,3,4,5,6-hexakis-O-(trimethylsilyl)-	47.945
Methyl 2-O-n-Butyl-3,4-dideoxy-.alpha.,D-glucopyranoside	34.5283
Silane, (hexadecyloxy)trimethyl- 1-Trimethylsiloxyhexadecane	42.4977
Pyridine (CAS) Azine Azabenzene Piridina Pirydyna Pyridin Pyr	6.6045
2-Methoxy-1,3-dioxolane 1,3-Dioxolane, 2-methoxy-	41.235
3,4-Dimethoxy-2,5-bis(t-butyl)benzaldehyde	21.451
2-Butenoic acid, 2-[(trimethylsilyl)oxy]-, trimethylsilyl ester	22.2268
2,5-Furandione, 3-methyl- (CAS) Citraconic anhydride Methylmalhydride	9.493
Levoglucosan, tris(trimethylsilyl)-	27.3155
Heptane, 3-methyl- (CAS) 3-Methylheptane 2-Ethylhexane	10.9817
?Silylation artifact formed from Dimethylsulfoxide and BSTFA	8.2976
2,4-Pentadienenitrile (CAS) CYANOBUTADIENE 1-Cyanobutadiene	6.81267
Butanedioic acid, methylene-, bis(trimethylsilyl) ester (CAS)	17.3487
Octadecanoic acid, trimethylsilyl ester (CAS) STEARIC ACID-MONOTMS	50.5133
6,7-DIHYDROXYCOUMARIN-.BETA.-D-GLUCOPYRANOSIDE, PENTA-TMS	59.6542
.beta.-l-Galactopyranoside, methyl 6-deoxy-2,3,4-tris-O-(trimethylsilyl)-	35.8445
ASCORBIC ACID PER-TMS	43.221
Allyl 5-O-methoxymethyl-.alpha.,D-ribofuranoside	30.3625
2-Pyrrolidone-5-carboxylic acid, trimethylsilyl ester	20.3245
Phenol, 2,4-bis(1,1-dimethylethyl)- (CAS) 2,4-Di-tert-butylphenol	20.5558
Methylmaleic acid, bis(trimethylsilyl) ester	17.7553
Cyclopentasiloxane, decamethyl- (CAS) Dimethylsiloxane pentamer	13.6672
methacryloyl cyanide 3-Butenenitrile, 3-methyl-2-oxo- (CAS)	7.01067
(2R*,3S*)-3-(1-Chloropropyl)pyrrolidine-1,2-dicarboxylic acid 1-methyl ester	36.643
l-Alanine, trimethylsilyl ester	9.414
Undecane (CAS) n-Undecane Hendecane n-C11H24 UNDECAN	18.4345
CIS-ACONITIC ACID-TRITMS TRISTRIMETHYLSILYL CIS-ACONITIC ACID	28.9245
1-Chloro-3-methyl-1-butyn-3-ol	8.3165
1,1-Diphenyl-2-(tributylgermyl)ethane	63.257
(S)-3-[(tert-butyldimethylsilyl)oxy]-1,2-epoxypropane	14.6935
1,1-bis[(diphenylthiophosphinyl)methyl]ethene	39.251
THREONIC ACID,O,O,O,O-TMS	21.939
3,6-heptanooxepin-4,5-dicarbonsaure-dimethylester	42.2332
1,6-Anhydro-.beta.-d-glucose, tris(trimethylsilyl) ether	27.3362
(+-)-5-Hydroxy-6-(1-hydroxyethyl)-2,7-dimethoxynaphthoquinone	21.453
2,5-Furandione, dihydro-3-methylene- Itaconic anhydride	11.404
D-Ribofuranose, 1,2,3,5-tetrakis-O-(trimethylsilyl)-	23.731
3-Amino-4H-thieno[3,4-c]-2H-chromen-4-one	34.8773
Dimethylsulfoxide-D6 Methane-D3-, sulfinylbis- Deutero-,dimethylsulfoxide	7.5384
Octadecanoic acid (CAS) Stearic acid n-Octadecanoic acid Vanicol	48.6725
2-Pentanone, 4-hydroxy-4-methyl- Acetonyldimethylcarbinol Tyranton	7.5412
Pyridine Azabenzene Azine Piridina Pirydyna Pyridin Pyr	6.9645
DIHYDRO-3-METHYLENE-2,5-FURANDIONE	9.49533
Arabinonic acid, 2,3,4-tris-O-(trimethylsilyl)-, lactone, D- (CAS)	24.2193
ASCORBIC ACID TETRATMS L-3-KETOTHREOHEXURONIC ACID LACTONE 1,2,4,5-TETRATMS	43.2312
Inositol, 1,2,3,4,5,6-hexakis-O-(trimethylsilyl)-, scyllo-	48.008
Benzaldehyde, 2,4-dimethyl- 2,4-Dimethylbenzaldehyde	15.2845
